# Supplementary figures and images for: Cell Stress Proteins in Atherothrombosis
Source: Hindawi journal article supplement (doi:10.1155/2012/232464), 2012-01-01

**SUPPLEMENTAL FIGURE 1.  PRISMA chart illustrating the search strategy.**


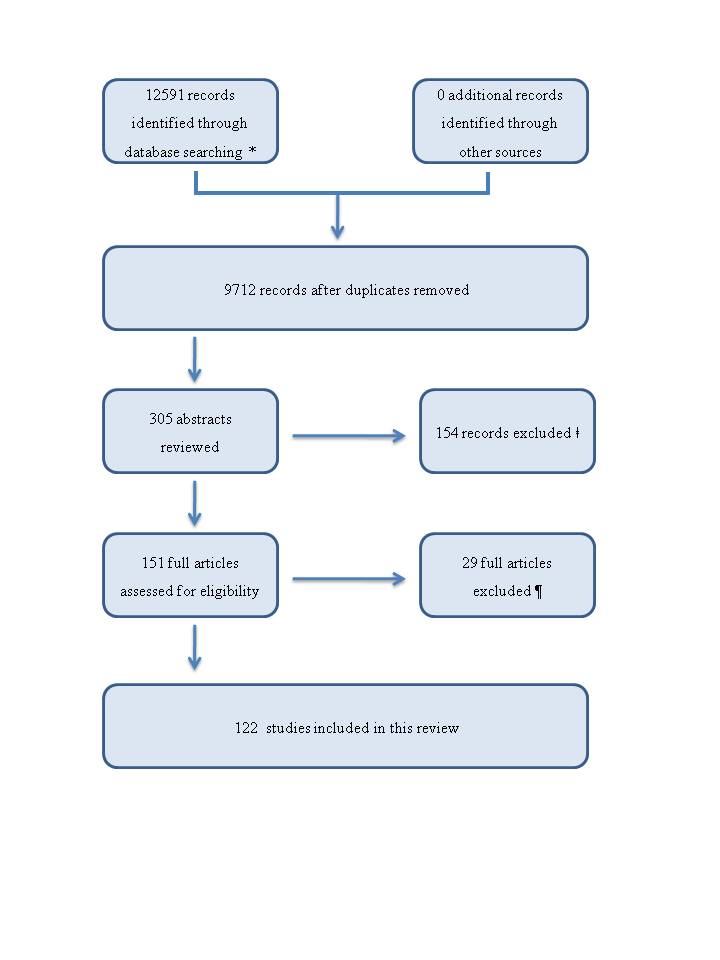


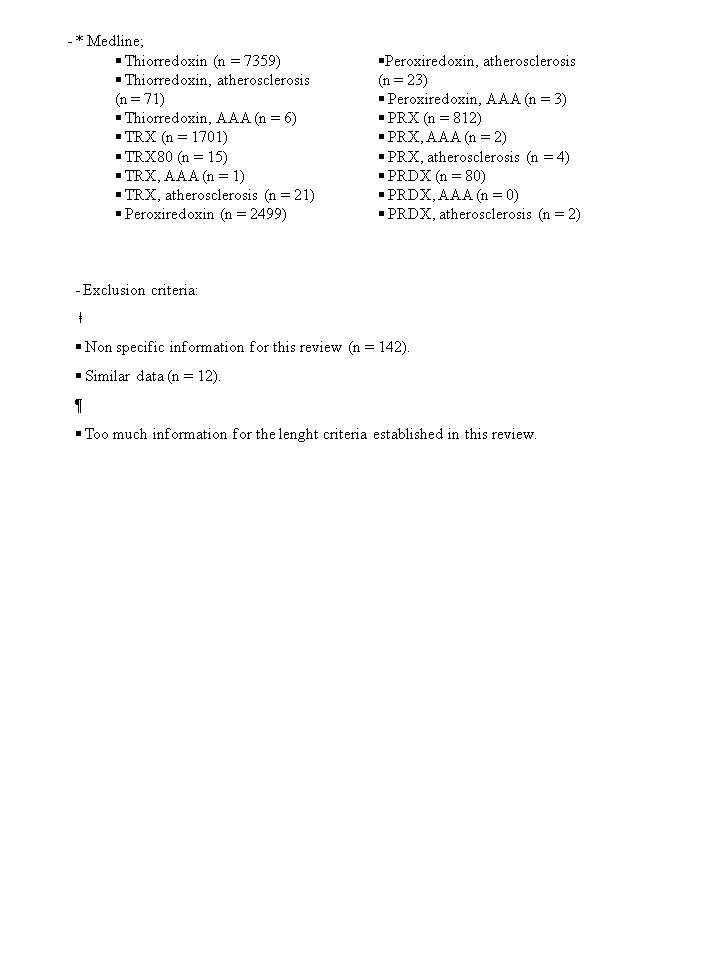

Supplement: f1 [file 232464.f1.docx]
